# Supplementary material for: Clinical, laboratory and imaging predictors for critical illness and mortality in patients with COVID-19: protocol for a systematic review and meta-analysis
Source: PubMed Central journal article supplement — BMJ Open. 2020 Dec 24;10(12):e039813. doi: 10.1136/bmjopen-2020-039813 (PMC7768616; doi:10.1136/bmjopen-2020-039813), 2020-12-24
Supplement: bmjopen-2020-039813.draft_revisions.pdf [file bmjopen-2020-039813.draft_revisions.pdf]

# BMJ Open

BMJ Open is committed to open peer review. As part of this commitment we make the peer review history of every article we publish publicly available.

When an article is published we post the peer reviewers' comments and the authors' responses online. We also post the versions of the paper that were used during peer review. These are the versions that the peer review comments apply to.

The versions of the paper that follow are the versions that were submitted during the peer review process. They are not the versions of record or the final published versions. They should not be cited or distributed as the published version of this manuscript.

BMJ Open is an open access journal and the full, final, typeset and author-corrected version of record of the manuscript is available on our site with no access controls, subscription charges or pay-per-view fees (<http://bmjopen.bmj.com>).

If you have any questions on BMJ Open's open peer review process please email [info.bmjopen@bmj.com](mailto:info.bmjopen@bmj.com)

# BMJ Open

## Clinical, laboratory, and imaging predictors for critically illness and mortality in patients with coronavirus disease 2019 (COVID-19): protocol for a systematic review and meta-analysis

|                               |                                                                                                                                                                                                                                                                                                                                                                                                                                                                                                                                                                                                                                                                                                                                                                               |
|-------------------------------|-------------------------------------------------------------------------------------------------------------------------------------------------------------------------------------------------------------------------------------------------------------------------------------------------------------------------------------------------------------------------------------------------------------------------------------------------------------------------------------------------------------------------------------------------------------------------------------------------------------------------------------------------------------------------------------------------------------------------------------------------------------------------------|
| Journal:                      | <i>BMJ Open</i>                                                                                                                                                                                                                                                                                                                                                                                                                                                                                                                                                                                                                                                                                                                                                               |
| Manuscript ID                 | bmjopen-2020-039813                                                                                                                                                                                                                                                                                                                                                                                                                                                                                                                                                                                                                                                                                                                                                           |
| Article Type:                 | Protocol                                                                                                                                                                                                                                                                                                                                                                                                                                                                                                                                                                                                                                                                                                                                                                      |
| Date Submitted by the Author: | 26-Apr-2020                                                                                                                                                                                                                                                                                                                                                                                                                                                                                                                                                                                                                                                                                                                                                                   |
| Complete List of Authors:     | Lai, Xinxing; Tsinghua University, MOE Key Laboratory of Bioinformatics, TCM-X Center/Bioinformatics Division; Beijing University of Chinese Medicine Affiliated Dongzhimen Hospital<br>Liu, Jian; China-Japan Friendship Hospital, Department of TCM Pulmonary Diseases, Center of Respiratory Medicine<br>Zhang, Tianyi; Beijing University of Chinese Medicine<br>Feng, Luda; Beijing University of Chinese Medicine,<br>Jiang, Ping; Beijing University of Chinese Medicine<br>Kang, Ligaoge; Fangshan Hospital, Beijing University of Chinese Medicine, Department of Emergency<br>Liu, Qiang; The Word Federation of Chinese Medicine Societies, Center for Evidence-based Medicine<br>Gao, Ying; Beijing University of Chinese Medicine Affiliated Dongzhimen Hospital |
| Keywords:                     | INTENSIVE & CRITICAL CARE, INFECTIOUS DISEASES, Public health < INFECTIOUS DISEASES                                                                                                                                                                                                                                                                                                                                                                                                                                                                                                                                                                                                                                                                                           |
|                               |                                                                                                                                                                                                                                                                                                                                                                                                                                                                                                                                                                                                                                                                                                                                                                               |

SCHOLARONE™  
Manuscripts

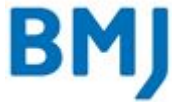

I, the Submitting Author has the right to grant and does grant on behalf of all authors of the Work (as defined in the below author licence), an exclusive licence and/or a non-exclusive licence for contributions from authors who are: i) UK Crown employees; ii) where BMJ has agreed a CC-BY licence shall apply, and/or iii) in accordance with the terms applicable for US Federal Government officers or employees acting as part of their official duties; on a worldwide, perpetual, irrevocable, royalty-free basis to BMJ Publishing Group Ltd ("BMJ") its licensees and where the relevant Journal is co-owned by BMJ to the co-owners of the Journal, to publish the Work in this journal and any other BMJ products and to exploit all rights, as set out in our [licence](#).

The Submitting Author accepts and understands that any supply made under these terms is made by BMJ to the Submitting Author unless you are acting as an employee on behalf of your employer or a postgraduate student of an affiliated institution which is paying any applicable article publishing charge ("APC") for Open Access articles. Where the Submitting Author wishes to make the Work available on an Open Access basis (and intends to pay the relevant APC), the terms of reuse of such Open Access shall be governed by a Creative Commons licence – details of these licences and which [Creative Commons](#) licence will apply to this Work are set out in our licence referred to above.

Other than as permitted in any relevant BMJ Author's Self Archiving Policies, I confirm this Work has not been accepted for publication elsewhere, is not being considered for publication elsewhere and does not duplicate material already published. I confirm all authors consent to publication of this Work and authorise the granting of this licence.

1  
2  
3  
4 **Clinical, laboratory, and imaging predictors for critically illness and**  
5  
6 **mortality in patients with coronavirus disease 2019 (COVID-19):**  
7  
8 **protocol for a systematic review and meta-analysis**  
9  
10

11 Xinxing Lai<sup>1,2</sup>, Jian Liu<sup>3</sup>, Tianyi Zhang<sup>4</sup>, Luda Feng<sup>4</sup>, Ping Jiang<sup>4</sup>, Ligaoge Kang<sup>5</sup>,

14 Qiang Liu<sup>6</sup>, Ying Gao<sup>2</sup>

- 17 1. MOE Key Laboratory of Bioinformatics, TCM-X Center/Bioinformatics Division,  
18 Tsinghua University, Beijing, China.  
19  
20 2. Dongzhimen Hospital, Beijing University of Chinese Medicine, Beijing, China.  
21  
22 3. Department of TCM Pulmonary Diseases, Center of Respiratory Medicine, China-  
23 Japan Friendship Hospital, Beijing, China.  
24  
25 4. Beijing University of Chinese Medicine, Beijing, China.  
26  
27 5. Department of Emergency, Fangshan Hospital, Beijing University of Chinese  
28 Medicine, Beijing, China.  
29  
30 6. Center for Evidence-based Medicine, the World Federation of Chinese Medicine  
31 Societies, Beijing, China.  
32  
33  
34  
35  
36  
37  
38  
39  
40  
41  
42  
43  
44

45 **Corresponding author:**

46 Dr. Ying Gao, MD.

47 Dongzhimen Hospital, Beijing University of Chinese Medicine

48 NO.5 Haiyuncang, Dongcheng District, Beijing, China

49 E-mail address: [gaoying973@163.com](mailto:gaoying973@163.com)

## ABSTRACT

**Introduction:** With the threat of a worldwide pandemic of COVID-19, it is important to identify the prognostic factors of critical conditions among patients with non-critical COVID-19 initially. Prognostic factors and models may assist front-line clinicians in rapid identification of high-risk patients, early management of modifiable factors, appropriate triaging, and optimizing use of the limited healthcare resources. We aim to systematically assess the clinical, laboratory, and imaging predictors, as well as prediction models for severe or critically illness and mortality in patients with COVID-19.

**Methods and analysis:** All peer-reviewed and pre-printed primary articles with a longitudinal design that focus on prognostic factors or models of COVID-19 related critically illness and mortality will be considered eligible through eleven databases including PubMed, EMBASE, Web of Science, Cochrane library, CNKI, VIP, Wanfang Data, SinoMed, as well as bioRxiv, Arxiv and MedRxiv. Study selection will follow the Preferred Reporting Items for Systematic Reviews and Meta-Analyses (PRISMA) guidelines, with data extraction using the modified version of Critical Appraisal and Data Extraction for Systematic Reviews of Prediction Modelling Studies (CHARMS-PF) checklist, and quality will be evaluated by the Newcastle-Ottawa Scale and the Quality in prognosis Studies (QUIPS) tool. The association of prognostic factors and outcomes of interest will be synthesized, and a meta-analysis will be conducted with three or more studies in a consistent manner reporting on a particular factor.

1  
2  
3  
4 **Ethics and dissemination:** We will disseminate our findings through a publication in  
5  
6 a peer reviewed journal.  
7

8  
9 **PROSPERO registration number:** CRD 42020178798  
10

### 11 **Strengths and limitations of this study**

- 12  
13  
14 1) The evidence synthesis on prognostic factors and models of COVID-19 related  
15  
16 critical conditions will play a pivotal role in assisting front-line clinical decision  
17  
18 making.  
19  
20  
21  
22 2) The quality of included studies will be evaluated using a validated tool (QUIPS)  
23  
24 specifically developed to assess the risk of bias of prognosis studies.  
25  
26  
27 3) Given that primary studies can be conducted in different region, population, or  
28  
29 setting, prognostic factors or models can be assessed using different tools,  
30  
31 heterogeneity in the pooled data may be a limitation of this review; however,  
32  
33 subgroup analyses will help overcome this limitation.  
34  
35  
36  
37  
38  
39

## 40 **INTRODUCTION**

### 41 **Description of the condition**

42  
43  
44  
45 Coronavirus disease 2019 (COVID-19), a newly emerged respiratory disease caused by  
46  
47 severe acute respiratory syndrome coronavirus 2 (SARS-CoV-2), was first reported in  
48  
49 December, 2019.<sup>1 2</sup> The infection has recently spread to at least 185 countries and  
50  
51 regions, with more than 2.9 million confirmed cases and 200,000 deaths worldwide as  
52  
53 of April 26, 2020.<sup>3</sup> The number of people infected is probably much higher due to the  
54  
55 shortage of tests for COVID-19. Despite a variety of rapid public health responses  
56  
57  
58  
59  
60

1  
2  
3  
4 aimed to contain the disease, many countries have been confronted with enormous  
5  
6 challenges of healthcare systems by the overwhelming number of patients who required  
7  
8 hospital admission, especially those with progression to severe or critically illness.<sup>4-8</sup>  
9  
10

### 11 **Why is important to do this review?**

12  
13  
14 A report of 72314 cases from the Chinese Center for Disease Control and Prevention  
15  
16 shown that most patients with COVID-19 exhibit asymptomatic, mild, or moderate  
17  
18 symptoms.<sup>9</sup> The vast majority of mild and moderate patients are recommended to stay  
19  
20 at home or admitted in shelter/field hospitals.<sup>10-14</sup> However, patients with mild  
21  
22 symptoms may developed rapidly worsening respiratory failure that required  
23  
24 intubation.<sup>7</sup> There were approximately 5% to 29% progress to severe or critical  
25  
26 condition, such as acute respiratory distress syndrome (ARDS), septic shock and/or  
27  
28 multiple organ failure, requiring intensive care unit (ICU) admission.<sup>9 15-18</sup> It is crucially  
29  
30 important to determine the prognostic factors that associated with the risk of  
31  
32 experiencing a subsequently critical outcome, among patients with non-critical  
33  
34 COVID-19 initially. Prognostic factors and prediction model of severe or critical  
35  
36 COVID-19 have many potential uses in various setting, including informing individuals  
37  
38 about the future course of their illness, aiding triage and referral, early management of  
39  
40 modifiable factors, treatment as well as other clinical decision making.  
41  
42  
43  
44  
45  
46  
47  
48  
49

### 50 **Status of current literature**

51  
52  
53 Evidence is rapidly accumulating about prognostic factors and models on COVID-19  
54  
55 related critical conditions or mortality. Recently, two systematic review of prediction  
56  
57 on COVID-19 has been published.<sup>19 20</sup> Henry and colleagues published a systematic  
58  
59  
60

1  
2  
3  
4 review which included only laboratory biomarkers, while excluded clinical and  
5  
6 imaging predictor associated with severe illness and mortality in COVID-19.<sup>19</sup> The  
7  
8 other review that focused on the prediction models for diagnosis and prognosis of  
9  
10 COVID-19 infection was published by Wynants and colleagues.<sup>20</sup> Eight studies of  
11  
12 prognostic models on severe state or mortality were included. However, only studies  
13  
14 aimed to develop or validate a model or scoring system were included, while those  
15  
16 aimed to predictor finding were excluded in this systematic review.<sup>20</sup> In addition, given  
17  
18 that China was the first epicenter of COVID-19, many studies of prediction on COVID-  
19  
20 19 may be published in Chinese journals. According to our preliminary results, there  
21  
22 are more than fifteen studies of prognostic factors or models have been published in  
23  
24 four Chinese databases (CNKI, WANFANG, CBM, and VIP), which were not searched  
25  
26 in this published systematic review. Limited data are available on the overview of  
27  
28 evidence that focus on clinical, laboratory, imaging prognostic factors for critical or  
29  
30 mortality of COVID-19. Furthermore, with the increasing number of cases across the  
31  
32 globe, data from other countries out of China will rapidly emerge over time. There is,  
33  
34 therefore, a need for a systematic review and meta-analysis to evaluate and synthesis  
35  
36 the current studies of clinical, laboratory, imaging prognostic factors and prediction  
37  
38 models for critical and mortality of COVID-19.  
39  
40  
41  
42  
43  
44  
45  
46  
47  
48  
49

### 50 **Research aims**

51  
52 We aim to systematically assess the clinical, laboratory, and imaging predictors, as well  
53  
54 as models for severe or critically illness and mortality in patients with COVID-19.  
55  
56  
57

### 58 **METHODS**



1  
2  
3  
4 This systematic review protocol followed the Preferred Reporting Items for Systematic  
5 review and Meta-Analysis Protocols recommendations (PRISMA-P)<sup>21</sup> and Cochrane  
6 Handbook. This review protocol has already been registered with the International  
7 Prospective Register of Systematic Reviews (PROSPERO, registration number: CRD  
8 42020178798).<sup>22</sup>

### 17 **Search strategy**

19 A systematic search of eleven public-domain databases including PubMed, EMBASE,  
20 Web of Science, Cochrane library, China National Knowledge Infrastructure (CNKI),  
21 Chinese Science and Technology Periodical Database (VIP), Wanfang database  
22 (Wanfang Data), China Biology Medicine disc (SinoMed), bioRxiv, Arxiv, as well as  
23 MedRxiv will be performed. We will use exploded Medical Subject Headings and the  
24 appropriate corresponding keywords relating to the population, combined with  
25 exposure and outcomes, such as: “COVID-19” OR “SARS-CoV-2” OR “2019-nCoV”  
26 “novel coronavirus” AND “critically” OR “severe” OR “mortality” OR “deterioration”  
27 AND “predictor” OR “prediction” OR “prognostic” OR “factor”. Further, publication  
28 list of the COVID-19 Living Systematic Review<sup>23</sup> and other resources<sup>24</sup> will be  
29 screened for additional relevant references. There will be no restrictions on language or  
30 publication status (preprint or peer reviewed articles). The research will be restricted to  
31 articles concerning humans from December 2019 to the present. We will include  
32 additional papers from other sources including the references of review articles or  
33 studies identified during screening. A sample search strategy for PubMed is shown in  
34 online supplementary appendix 1.

## **Eligibility criteria**

### **Participants**

All patients with confirmed diagnosis of coronavirus disease 2019 (COVID-19), with an explicit classification of mild, moderate, severe, or critically ill according to accepted criteria.

### **Exposures**

Any information related to demographics, symptoms and signs, pulmonary functions, laboratory tests, radiological findings, comorbidities, as well as interventions will be considered as potential predictors for critically illness or mortality in patients of COVID-19.

### **Comparators**

Participants with and without specific clinical, laboratory, imaging information will be compared to clarify its significance to predict the critically illness and mortality of COVID-19.

### **Outcomes**

COVID related deterioration, progression, severe, critical illness or death according to accepted criteria.

### **Timing and setting**

There will be no restriction on the time point when the prognostic factors were under review, as well as the time period when the outcomes were predicted. No restriction will be made on the setting (e.g., inpatients, outpatients, and shelter hospitals).

### **Types of study to be included**

1  
2  
3  
4 Both experimental and longitudinal observational studies such as randomized  
5  
6 controlled trial, cohort study, case-control study, and registry study will be included.  
7

8  
9 Review articles, editorials, letters, comments, case reports, cross-sectional study, as  
10  
11 well as those failing to investigate the prognostic factors or models for critically illness  
12  
13 or mortality will be excluded.  
14  
15

### 16 17 **Study selection**

18  
19 Two reviewers (Jian Liu, Luda Feng) will independently perform initial search and  
20  
21 examine the titles, abstracts, and if necessary, full-texts to identify eligible studies  
22  
23 according to the inclusion and exclusion criteria. Disagreement between reviewers will  
24  
25 be resolved by consensus and in case of persistent disagreement by adjudication of a  
26  
27 third reviewer (Qiang Liu). The selection process will be illustrated in a Preferred  
28  
29 Reporting Items for Systematic Reviews and Meta-Analyses diagram (Figure 1. Flow  
30  
31 diagram of the study selection process).<sup>25</sup>  
32  
33  
34  
35  
36

### 37 38 **Data extraction**

39  
40 Data extraction will be conducted by two reviewers (Tianyi Zhang, Ping Jiang)  
41  
42 independently, using a standard data extraction form developed according to CHARMS  
43  
44 checklist for prediction model studies and its modified edition (CHARMS-PF),<sup>26 27</sup> as  
45  
46 well as PROBAST (prediction model risk of bias assessment tool).<sup>28</sup> For each included  
47  
48 trial, the following key information will be extracted where available: name of first  
49  
50 author, year of publication, study location, study design, study setting, participants,  
51  
52 sample size, follow-up period, outcomes of interest, risk and prognostic factors, missing  
53  
54 data, summary statistics, results, interpretation and discussion. Authors of studies will  
55  
56  
57  
58  
59  
60

1  
2  
3  
4 be contacted through email or telephone in case of missing relevant data.  
5

### 6 **Risk of bias assessment**

7  
8  
9 We will evaluate risk of bias using the Newcastle-Ottawa Scale<sup>29</sup> and the QUIPS  
10  
11 checklist (quality in prognostic factor studies) which has been recommended by the  
12  
13 Cochrane Group to assess the risk of bias in prognostic factor studies.<sup>30</sup> Quality  
14  
15 assessment will be done independently by two reviewers (Tianyi Zhang, Ligeog Kang),  
16  
17 and discrepancies will be resolved through consensus.  
18  
19  
20  
21

### 22 **Data synthesis**

23  
24 Essential data will be summarized in tables for evaluation. Estimates of risk difference  
25  
26 in terms of critically illness and mortality will be calculated. For categorical variables,  
27  
28 ORs, RRs, or HRs will be analyzed to compare these variables between mild/moderate  
29  
30 and severe/critical COVID-19 cases. Studies reporting adjusted or unadjusted results  
31  
32 will be analyzed separately. Only unadjusted effect estimates for prognostic factor will  
33  
34 be combined, while effect estimates from multivariate models will be described  
35  
36 qualitatively. With three or more studies in a consistent manner reporting on a particular  
37  
38 factor, a meta-analysis will be conducted using the Review Manager software (RevMan  
39  
40 5.3, the Cochrane Collaboration) to synthesize the association of prognostic factors and  
41  
42 critically illness or mortality in patients with COVID-19. Heterogeneity among the  
43  
44 include studies will be tested using the  $I^2$  statistic.<sup>31</sup> Forest plots will be presented for  
45  
46 significant predictors. In case of substantial heterogeneity, subgroup analyses will be  
47  
48 conducted to examine or explore the causes of heterogeneity. Subgroup analysis will  
49  
50 base on the categories defined by characteristics as following: study location/region,  
51  
52  
53  
54  
55  
56  
57  
58  
59  
60

1  
2  
3  
4 risk of bias, and particular population such as children, elder people.  
5

### 6 **Ethics and dissemination**

7  
8  
9 Ethical approval is not required for this systematic review. We will disseminate our  
10  
11 findings through a publication in a peer reviewed journal.  
12  
13

### 14 **Patient and public involvement**

15  
16  
17 There is no patient and public involvement in the whole process of conducting this  
18  
19 systematic review.  
20  
21  
22  
23

## 24 **DISCUSSION**

25  
26  
27 With the unprecedented threat of a worldwide pandemic of COVID-19, there has been  
28  
29 an increasing need for early identification of patients at higher risk of progression to  
30  
31 critical illness, or even to death. This systematic review will comprehensively  
32  
33 summarize the existing evidence on clinical, laboratory, and imaging factors and  
34  
35 models for predicting critical conditions and mortality in patients with COVID-19. The  
36  
37 findings will provide front-line clinicians an early surrogate of disease severity before  
38  
39 the onset of critical illness, which may play a key role in assisting clinicians to early  
40  
41 manage modifiable factors, triage patients appropriately and optimize use of the limited  
42  
43 healthcare resources.  
44  
45  
46  
47  
48  
49  
50  
51  
52

### 53 **Acknowledgements**

54  
55  
56 We gratefully acknowledge Wei Chen from the Centre for Evidence-Based Chinese  
57  
58 Medicine, Beijing University of Chinese Medicine, for her great help on the  
59  
60

1  
2  
3  
4 improvement of methodology of this protocol.  
5

### 6 **Author affiliations**

7  
8  
9 <sup>1</sup>MOE Key Laboratory of Bioinformatics, TCM-X Center/Bioinformatics Division,  
10  
11  
12 Tsinghua University, Beijing, China.

13  
14 <sup>2</sup>Dongzhimen Hospital, Beijing University of Chinese Medicine, Beijing, China.

15  
16  
17 <sup>3</sup>Department of TCM Pulmonary Diseases, Center of Respiratory Medicine, China-  
18  
19  
20 Japan Friendship Hospital, Beijing, China.

21  
22 <sup>4</sup>Beijing University of Chinese Medicine, Beijing, China.

23  
24  
25 <sup>5</sup>Department of Emergency, Fangshan Hospital, Beijing University of Chinese  
26  
27  
28 Medicine, Beijing, China.

29  
30 <sup>6</sup>Center for Evidence-based Medicine, the World Federation of Chinese Medicine  
31  
32  
33 Societies, Beijing, China.

### 34 **Contributors**

35  
36  
37 XL, YG conceived the research question. TZ, LF, PJ and LK developed the search  
38  
39  
40 strategy and performed the preliminary search, screening and data extraction. QL and  
41  
42  
43 YG contributed to the methodological development of the protocol. XL and JL drafted  
44  
45  
46 the manuscript. QL and YG revised the manuscript and all authors developed and  
47  
48  
49 approved the final manuscript before submission.

### 50 **Funding**

51  
52  
53 None.

### 54 **Competing interests**

55  
56  
57  
58  
59  
60 None declared.

## Patient consent for publication

Not required.

## Provenance and peer review

Not commissioned; externally peer reviewed.

## References:

1. Wang C, Horby PW, Hayden FG, *et al.* A novel coronavirus outbreak of global health concern. *Lancet* 2020;395:470-3.
2. Munster VJ, Koopmans M, van Doremalen N, *et al.* A novel coronavirus emerging in china - key questions for impact assessment. *N Engl J Med* 2020;382:692-4.
3. Dong E, Du H, Gardner L. An interactive web-based dashboard to track covid-19 in real time. *Lancet Infect Dis* 2020.
4. Grasselli G, Zangrillo A, Zanella A, *et al.* Baseline characteristics and outcomes of 1591 patients infected with SARS-cov-2 admitted to icus of the lombardy region, italy. *JAMA* 2020.
5. Xie J, Tong Z, Guan X, *et al.* Critical care crisis and some recommendations during the covid-19 epidemic in china. *Intensive Care Med* 2020.
6. Grasselli G, Pesenti A, Cecconi M. Critical care utilization for the covid-19 outbreak in lombardy, italy: early experience and forecast during an emergency response. *JAMA* 2020.
7. Goh KJ, Choong MC, Cheong EH, *et al.* Rapid progression to acute respiratory distress syndrome: review of current understanding of critical illness from covid-19 infection. *Ann Acad Med Singapore* 2020;49:108-18.
8. Arabi YM, Murthy S, Webb S. Covid-19: a novel coronavirus and a novel challenge for critical care. *Intensive Care Med* 2020.
9. Wu Z, McGoogan JM. Characteristics of and important lessons from the coronavirus disease 2019 (covid-19) outbreak in china: summary of a report of 72314 cases from the chinese center for disease control and prevention. *JAMA* 2020.
10. Gostin LO, Wiley LF. Governmental public health powers during the covid-19 pandemic: stay-at-home orders, business closures, and travel restrictions. *JAMA* 2020.
11. Park PG, Kim CH, Heo Y, *et al.* Out-of-hospital cohort treatment of coronavirus disease 2019 patients with mild symptoms in korea: an experience from a single community treatment center. *JKorean Med Sci* 2020;35.
12. Kmietowicz Z. Covid-19: highest risk patients are asked to stay at home for 12 weeks. *BMJ* 2020:m1170.
13. Chen Z, He S, Li F, *et al.* Mobile field hospitals, an effective way of dealing with covid-19 in china: sharing our experience. *Biosci Trends* 2020.
14. Chen S, Zhang Z, Yang J, *et al.* Fangcang shelter hospitals: a novel concept for responding to public health emergencies. *Lancet* 2020;395:1305-14.
15. Huang C, Wang Y, Li X, *et al.* Clinical features of patients infected with 2019 novel coronavirus in wuhan, china. *Lancet* 2020;395:497-506.

16. Rodriguez-Morales AJ, Cardona-Ospina JA, Gutierrez-Ocampo E, *et al.* Clinical, laboratory and imaging features of covid-19: a systematic review and meta-analysis. *Travel Med Infect Dis* 2020:101623.
17. Cao Y, Liu X, Xiong L, *et al.* Imaging and clinical features of patients with 2019 novel coronavirus SARS-cov-2: a systematic review and meta-analysis. *J Med Virol* 2020.
18. Xu Z, Shi L, Wang Y, *et al.* Pathological findings of covid-19 associated with acute respiratory distress syndrome. *Lancet Respir Med* 2020;8:420-2.
19. Henry BM, de Oliveira M, Benoit S, *et al.* Hematologic, biochemical and immune biomarker abnormalities associated with severe illness and mortality in coronavirus disease 2019 (covid-19): a meta-analysis. *Clin Chem Lab Med* 2020.
20. Wynants L, Van Calster B, Bonten M, *et al.* Prediction models for diagnosis and prognosis of covid-19 infection: systematic review and critical appraisal. *BMJ* 2020;369:m1328.
21. Preferred reporting items for systematic review and meta-analysis protocols (prisma-p) 2015: elaboration and explanation. *BMJ* 2016;354:i4086.
22. Centre for Reviews and Dissemination, University of York. PROSPERO: International Prospective Register of Systematic Reviews.  
([https://www.crd.york.ac.uk/prospERO/display\\_record.php?ID=CRD42020178798](https://www.crd.york.ac.uk/prospERO/display_record.php?ID=CRD42020178798))
23. Institute of Social and Preventive Medicine. Living evidence on COVID-19 2020.  
(<https://ispmbern.github.io/covid-19/living-review/index.html>)
24. Shokraneh F. Keeping up with studies on covid-19: systematic search strategies and resources. *BMJ* 2020;369:m1601.
25. Liberati A, Altman DG, Tetzlaff J, *et al.* The prisma statement for reporting systematic reviews and meta-analyses of studies that evaluate healthcare interventions: explanation and elaboration. *BMJ* 2009;339:b2700.
26. Riley RD, Moons K, Snell K, *et al.* A guide to systematic review and meta-analysis of prognostic factor studies. *BMJ* 2019;364:k4597.
27. Moons KG, de Groot JA, Bouwmeester W, *et al.* Critical appraisal and data extraction for systematic reviews of prediction modelling studies: the charms checklist. *Plos Med* 2014;11:e1001744.
28. Moons K, Wolff RF, Riley RD, *et al.* Probast: a tool to assess risk of bias and applicability of prediction model studies: explanation and elaboration. *Ann Intern Med* 2019;170:W1-33.
29. Wells GA, Shea B, O'Connell D, *et al.* The Newcastle-Ottawa Scale (NOS) for assessing the quality of nonrandomized studies in meta-analyses. 2009.  
([http://www.ohri.ca/programs/clinical\\_epidemiology/oxford.htm](http://www.ohri.ca/programs/clinical_epidemiology/oxford.htm))
30. Hayden JA, van der Windt DA, Cartwright JL, *et al.* Assessing bias in studies of prognostic factors. *Ann Intern Med* 2013;158:280-6.
31. Higgins JP, Thompson SG, Deeks JJ, *et al.* Measuring inconsistency in meta-analyses. *BMJ* 2003;327:557-60.



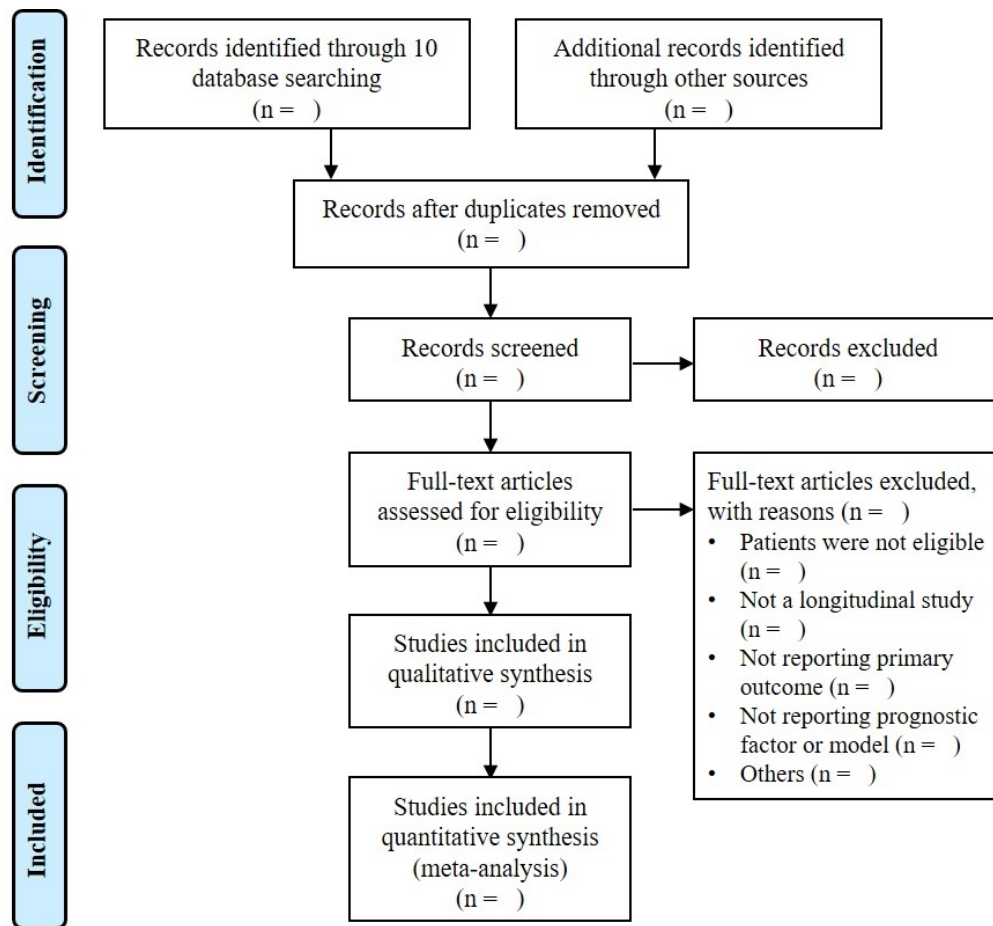

Figure 1. Flow diagram of the study selection process

146x134mm (150 x 150 DPI)

## Appendix 1. Search Strategy Example: PubMed search

| No        | Search items                                                              |
|-----------|---------------------------------------------------------------------------|
| 1         | “Covid-19”[All Fields]                                                    |
| 2         | “coronavirus disease 2019”[All Fields]                                    |
| 3         | “SARS-CoV-2”[All Fields]                                                  |
| 4         | “novel coronavirus”[All Fields]                                           |
| 5         | “new coronavirus”[All Fields]                                             |
| 6         | “severe acute respiratory syndrome coronavirus<br>2”[All Fields]          |
| 7         | “novel coronavirus-infected pneumonia”[All<br>Fields]                     |
| 8         | “2019-nCoV”[All Fields]                                                   |
| 9         | “Wuhan coronavirus”[All Fields]                                           |
| 10        | “NCP”[All Fields]                                                         |
| <b>11</b> | <b>1 OR 2 OR 3 OR 4 OR 5 OR 6 OR 7 OR 8 OR<br/>9 OR 10</b>                |
| 12        | “Critical*”[title/abstract]                                               |
| 13        | “intensive”[title/abstract]                                               |
| 14        | “ICU” [title/abstract]                                                    |
| 15        | “severe” [title/abstract]                                                 |
| 16        | “death” [title/abstract]                                                  |
| 17        | “mortality” [title/abstract]                                              |
| 18        | “decease*” [title/abstract]                                               |
| 19        | “survival” [title/abstract]                                               |
| 20        | “deteriorate*” [title/abstract]                                           |
| 21        | “worsen*” [title/abstract]                                                |
| 22        | “progress*” [title/abstract]                                              |
| <b>23</b> | <b>12 OR 13 OR 14 OR 15 OR 16 OR 17 OR 18<br/>OR 19 OR 20 OR 21 OR 22</b> |
| 24        | “predict*” [title/abstract]                                               |
| 25        | “prognos*”[title/abstract]                                                |
| 26        | “risk”[title/abstract]                                                    |
| 27        | “factor”[title/abstract]                                                  |
| 28        | “algorithm”[title/abstract]                                               |
| 29        | “score” [title/abstract]                                                  |
| 30        | “marker*” [title/abstract]                                                |
| 31        | “biomarker*” [title/abstract]                                             |
| <b>32</b> | <b>24 OR 25 26 OR 27 OR 28 OR 29 OR 30 OR<br/>31</b>                      |
| 33        | “humans”[filter]                                                          |
| 34        | “review”[filter]                                                          |
| 35        | “case reports” [filter]                                                   |
| 36        | “editorial” [filter]                                                      |
| <b>37</b> | <b>33 OR 34 OR 35 OR 36</b>                                               |
| <b>38</b> | <b>(11 AND 23 AND 32 AND 33) NOT 37</b>                                   |

**PRISMA-P (Preferred Reporting Items for Systematic review and Meta-Analysis Protocols) 2015 checklist: recommended items to address in a systematic review protocol\***

| Section/topic                     | #  | Checklist item                                                                                                                                                                                                            | Information reported                |                          | Page number(s) |
|-----------------------------------|----|---------------------------------------------------------------------------------------------------------------------------------------------------------------------------------------------------------------------------|-------------------------------------|--------------------------|----------------|
|                                   |    |                                                                                                                                                                                                                           | Yes                                 | No                       |                |
| <b>ADMINISTRATIVE INFORMATION</b> |    |                                                                                                                                                                                                                           |                                     |                          |                |
| <b>Title</b>                      |    |                                                                                                                                                                                                                           |                                     |                          |                |
| Identification                    | 1a | Identify the report as a protocol of a systematic review                                                                                                                                                                  | <input checked="" type="checkbox"/> | <input type="checkbox"/> | 1              |
| Update                            | 1b | If the protocol is for an update of a previous systematic review, identify as such                                                                                                                                        | <input type="checkbox"/>            | <input type="checkbox"/> | NA             |
| <b>Registration</b>               | 2  | If registered, provide the name of the registry (e.g., PROSPERO) and registration number in the Abstract                                                                                                                  | <input type="checkbox"/>            | <input type="checkbox"/> | 3              |
| <b>Authors</b>                    |    |                                                                                                                                                                                                                           |                                     |                          |                |
| Contact                           | 3a | Provide name, institutional affiliation, and e-mail address of all protocol authors; provide physical mailing address of corresponding author                                                                             | <input checked="" type="checkbox"/> | <input type="checkbox"/> | 1              |
| Contributions                     | 3b | Describe contributions of protocol authors and identify the guarantor of the review                                                                                                                                       | <input checked="" type="checkbox"/> | <input type="checkbox"/> | 11             |
| <b>Amendments</b>                 | 4  | If the protocol represents an amendment of a previously completed or published protocol, identify as such and list changes; otherwise, state plan for documenting important protocol amendments                           | <input type="checkbox"/>            | <input type="checkbox"/> | NA             |
| <b>Support</b>                    |    |                                                                                                                                                                                                                           |                                     |                          |                |
| Sources                           | 5a | Indicate sources of financial or other support for the review                                                                                                                                                             | <input type="checkbox"/>            | <input type="checkbox"/> | NA             |
| Sponsor                           | 5b | Provide name for the review funder and/or sponsor                                                                                                                                                                         | <input type="checkbox"/>            | <input type="checkbox"/> | NA             |
| Role of sponsor/funder            | 5c | Describe roles of funder(s), sponsor(s), and/or institution(s), if any, in developing the protocol                                                                                                                        | <input type="checkbox"/>            | <input type="checkbox"/> | NA             |
| <b>INTRODUCTION</b>               |    |                                                                                                                                                                                                                           |                                     |                          |                |
| <b>Rationale</b>                  | 6  | Describe the rationale for the review in the context of what is already known                                                                                                                                             | <input checked="" type="checkbox"/> | <input type="checkbox"/> | 4, 5           |
| <b>Objectives</b>                 | 7  | Provide an explicit statement of the question(s) the review will address with reference to participants, interventions, comparators, and outcomes (PICO)                                                                  | <input checked="" type="checkbox"/> | <input type="checkbox"/> | 5              |
| <b>METHODS</b>                    |    |                                                                                                                                                                                                                           |                                     |                          |                |
| <b>Eligibility criteria</b>       | 8  | Specify the study characteristics (e.g., PICO, study design, setting, time frame) and report characteristics (e.g., years considered, language, publication status) to be used as criteria for eligibility for the review | <input checked="" type="checkbox"/> | <input type="checkbox"/> | 7, 8           |
| <b>Information sources</b>        | 9  | Describe all intended information sources (e.g., electronic databases, contact with study authors, trial registers, or other grey literature sources) with planned dates of coverage                                      | <input checked="" type="checkbox"/> | <input type="checkbox"/> | 6              |
| <b>Search strategy</b>            | 10 | Present draft of search strategy to be used for at least one electronic database, including planned limits, such that it could be repeated                                                                                | <input checked="" type="checkbox"/> | <input type="checkbox"/> | 6              |

| Section/topic                      | #   | Checklist item                                                                                                                                                                                                                              | Information reported                |                                     | Page number(s) |
|------------------------------------|-----|---------------------------------------------------------------------------------------------------------------------------------------------------------------------------------------------------------------------------------------------|-------------------------------------|-------------------------------------|----------------|
|                                    |     |                                                                                                                                                                                                                                             | Yes                                 | No                                  |                |
| <b>STUDY RECORDS</b>               |     |                                                                                                                                                                                                                                             |                                     |                                     |                |
| Data management                    | 11a | Describe the mechanism(s) that will be used to manage records and data throughout the review                                                                                                                                                | <input checked="" type="checkbox"/> | <input type="checkbox"/>            | 8              |
| Selection process                  | 11b | State the process that will be used for selecting studies (e.g., two independent reviewers) through each phase of the review (i.e., screening, eligibility, and inclusion in meta-analysis)                                                 | <input checked="" type="checkbox"/> | <input type="checkbox"/>            | 8              |
| Data collection process            | 11c | Describe planned method of extracting data from reports (e.g., piloting forms, done independently, in duplicate), any processes for obtaining and confirming data from investigators                                                        | <input checked="" type="checkbox"/> | <input type="checkbox"/>            | 8              |
| Data items                         | 12  | List and define all variables for which data will be sought (e.g., PICO items, funding sources), any pre-planned data assumptions and simplifications                                                                                       | <input checked="" type="checkbox"/> | <input type="checkbox"/>            | 8              |
| Outcomes and prioritization        | 13  | List and define all outcomes for which data will be sought, including prioritization of main and additional outcomes, with rationale                                                                                                        | <input checked="" type="checkbox"/> | <input type="checkbox"/>            | 7              |
| Risk of bias in individual studies | 14  | Describe anticipated methods for assessing risk of bias of individual studies, including whether this will be done at the outcome or study level, or both; state how this information will be used in data synthesis                        | <input checked="" type="checkbox"/> | <input type="checkbox"/>            | 9              |
| <b>DATA</b>                        |     |                                                                                                                                                                                                                                             |                                     |                                     |                |
| Synthesis                          | 15a | Describe criteria under which study data will be quantitatively synthesized                                                                                                                                                                 | <input checked="" type="checkbox"/> | <input type="checkbox"/>            | 9              |
|                                    | 15b | If data are appropriate for quantitative synthesis, describe planned summary measures, methods of handling data, and methods of combining data from studies, including any planned exploration of consistency (e.g., $I^2$ , Kendall's tau) | <input checked="" type="checkbox"/> | <input type="checkbox"/>            | 9              |
|                                    | 15c | Describe any proposed additional analyses (e.g., sensitivity or subgroup analyses, meta-regression)                                                                                                                                         | <input checked="" type="checkbox"/> | <input type="checkbox"/>            | 9              |
|                                    | 15d | If quantitative synthesis is not appropriate, describe the type of summary planned                                                                                                                                                          | <input checked="" type="checkbox"/> | <input type="checkbox"/>            | 9              |
| Meta-bias(es)                      | 16  | Specify any planned assessment of meta-bias(es) (e.g., publication bias across studies, selective reporting within studies)                                                                                                                 | <input checked="" type="checkbox"/> | <input type="checkbox"/>            | 9              |
| Confidence in cumulative evidence  | 17  | Describe how the strength of the body of evidence will be assessed (e.g., GRADE)                                                                                                                                                            | <input type="checkbox"/>            | <input checked="" type="checkbox"/> | NA             |

\* It is strongly recommended that this checklist be read in conjunction with the PRISMA-P Explanation and Elaboration (cite when available) for important clarification on the items. Amendments to a review protocol should be tracked and dated. The copyright for PRISMA-P (including checklist) is held by the PRISMA-P Group and is distributed under a Creative Commons Attribution Licence 4.0.

From: Shamseer L, Moher D, Clarke M, Ghersi D, Liberati A, Petticrew M, Shekelle P, Stewart L, PRISMA-P Group. Preferred reporting items for systematic review and meta-analysis protocols (PRISMA-P) 2015: elaboration and explanation. *BMJ*. 2015 Jan 2;349(jan02 1):g7647.

# BMJ Open

## Clinical, laboratory, and imaging predictors for critical illness and mortality in patients with coronavirus disease 2019: protocol for a systematic review and meta-analysis

|                                 |                                                                                                                                                                                                                                                                                                                                                                                                                                                                                                                                                                                                                                                                                                                                                                                |
|---------------------------------|--------------------------------------------------------------------------------------------------------------------------------------------------------------------------------------------------------------------------------------------------------------------------------------------------------------------------------------------------------------------------------------------------------------------------------------------------------------------------------------------------------------------------------------------------------------------------------------------------------------------------------------------------------------------------------------------------------------------------------------------------------------------------------|
| Journal:                        | <i>BMJ Open</i>                                                                                                                                                                                                                                                                                                                                                                                                                                                                                                                                                                                                                                                                                                                                                                |
| Manuscript ID                   | bmjopen-2020-039813.R1                                                                                                                                                                                                                                                                                                                                                                                                                                                                                                                                                                                                                                                                                                                                                         |
| Article Type:                   | Protocol                                                                                                                                                                                                                                                                                                                                                                                                                                                                                                                                                                                                                                                                                                                                                                       |
| Date Submitted by the Author:   | 08-Sep-2020                                                                                                                                                                                                                                                                                                                                                                                                                                                                                                                                                                                                                                                                                                                                                                    |
| Complete List of Authors:       | Lai, Xinxing; Tsinghua University, MOE Key Laboratory of Bioinformatics, TCM-X Center/Bioinformatics Division; Beijing University of Chinese Medicine Affiliated Dongzhimen Hospital<br>Liu, Jian; China-Japan Friendship Hospital, Department of TCM Pulmonary Diseases, Center of Respiratory Medicine<br>Zhang, Tianyi; Beijing University of Chinese Medicine<br>Feng, Luda; Beijing University of Chinese Medicine,<br>Jiang, Ping; Beijing University of Chinese Medicine<br>Kang, Ligaoge; Fangshan Hospital, Beijing University of Chinese Medicine, Department of Emergency<br>Liu, Qiang; The World Federation of Chinese Medicine Societies, Center for Evidence-based Medicine<br>Gao, Ying; Beijing University of Chinese Medicine Affiliated Dongzhimen Hospital |
| <b>Primary Subject Heading</b>: | Infectious diseases                                                                                                                                                                                                                                                                                                                                                                                                                                                                                                                                                                                                                                                                                                                                                            |
| Secondary Subject Heading:      | Infectious diseases, Medical management, Public health                                                                                                                                                                                                                                                                                                                                                                                                                                                                                                                                                                                                                                                                                                                         |
| Keywords:                       | INFECTIOUS DISEASES, Public health < INFECTIOUS DISEASES, COVID-19, Adult intensive & critical care < ANAESTHETICS                                                                                                                                                                                                                                                                                                                                                                                                                                                                                                                                                                                                                                                             |
|                                 |                                                                                                                                                                                                                                                                                                                                                                                                                                                                                                                                                                                                                                                                                                                                                                                |

SCHOLARONE™  
Manuscripts



I, the Submitting Author has the right to grant and does grant on behalf of all authors of the Work (as defined in the below author licence), an exclusive licence and/or a non-exclusive licence for contributions from authors who are: i) UK Crown employees; ii) where BMJ has agreed a CC-BY licence shall apply, and/or iii) in accordance with the terms applicable for US Federal Government officers or employees acting as part of their official duties; on a worldwide, perpetual, irrevocable, royalty-free basis to BMJ Publishing Group Ltd ("BMJ") its licensees and where the relevant Journal is co-owned by BMJ to the co-owners of the Journal, to publish the Work in this journal and any other BMJ products and to exploit all rights, as set out in our [licence](#).

The Submitting Author accepts and understands that any supply made under these terms is made by BMJ to the Submitting Author unless you are acting as an employee on behalf of your employer or a postgraduate student of an affiliated institution which is paying any applicable article publishing charge ("APC") for Open Access articles. Where the Submitting Author wishes to make the Work available on an Open Access basis (and intends to pay the relevant APC), the terms of reuse of such Open Access shall be governed by a Creative Commons licence – details of these licences and which [Creative Commons](#) licence will apply to this Work are set out in our licence referred to above.

Other than as permitted in any relevant BMJ Author's Self Archiving Policies, I confirm this Work has not been accepted for publication elsewhere, is not being considered for publication elsewhere and does not duplicate material already published. I confirm all authors consent to publication of this Work and authorise the granting of this licence.

1  
2  
3  
4 **Title: Clinical, laboratory, and imaging predictors for critical illness**  
5  
6 **and mortality in patients with coronavirus disease 2019: protocol for**  
7  
8 **a systematic review and meta-analysis**  
9  
10

11  
12  
13  
14 **Authors:** Xinxing Lai<sup>1,2</sup>, Jian Liu<sup>3</sup>, Tianyi Zhang<sup>4</sup>, Luda Feng<sup>4</sup>, Ping Jiang<sup>4</sup>, Ligaoge  
15  
16 Kang<sup>5</sup>, Qiang Liu<sup>6</sup>, Ying Gao<sup>2</sup>  
17

18  
19  
20 1. MOE Key Laboratory of Bioinformatics, TCM-X Center/Bioinformatics Division,  
21  
22 Tsinghua University, Beijing, China.  
23

24  
25 2. Dongzhimen Hospital, Beijing University of Chinese Medicine, Beijing, China.  
26

27  
28 3. Department of TCM Pulmonary Diseases, Center of Respiratory Medicine, China-  
29  
30 Japan Friendship Hospital, Beijing, China.  
31

32  
33 4. Beijing University of Chinese Medicine, Beijing, China.  
34

35  
36 5. Department of Emergency, Fangshan Hospital, Beijing University of Chinese  
37  
38 Medicine, Beijing, China.  
39

40  
41 6. Center for Evidence-based Medicine, the Word Federation of Chinese Medicine  
42  
43 Societies, Beijing, China.  
44

45 **Corresponding author:**  
46

47  
48 Dr. Ying Gao, MD.  
49

50  
51 Dongzhimen Hospital, Beijing University of Chinese Medicine  
52

53  
54 NO.5 Haiyuncang, Dongcheng District, Beijing 100700, China  
55

56  
57 E-mail address: [gaoying973@163.com](mailto:gaoying973@163.com)  
58

59 **Word count:** 2039  
60

## ABSTRACT

**Introduction:** With the threat of a worldwide pandemic of coronavirus disease 2019 (COVID-19), it is important to identify the prognostic factors for critical conditions among patients with non-critical COVID-19. Prognostic factors and models may assist front-line clinicians in rapid identification of high-risk patients, early management of modifiable factors, appropriate triaging, and optimising the use of limited healthcare resources. We aim to systematically assess the clinical, laboratory, and imaging predictors as well as prediction models for severe or critical illness and mortality in patients with COVID-19.

**Methods and analysis:** All peer-reviewed and pre-print primary articles with a longitudinal design that focussed on prognostic factors or models for critical illness and mortality related to COVID-19 will be eligible for inclusion. A systematic search of 11 databases including PubMed, EMBASE, Web of Science, Cochrane library, CNKI, VIP, Wanfang Data, SinoMed, bioRxiv, Arxiv, and MedRxiv will be conducted. Study selection will follow the Preferred Reporting Items for Systematic Reviews and Meta-Analyses guidelines. Data extraction will be performed using the modified version of the Critical Appraisal and Data Extraction for Systematic Reviews of Prediction Modelling Studies checklist and quality will be evaluated using the Newcastle-Ottawa Scale and the Quality In Prognosis Studies tool. The association between prognostic factors and outcomes of interest will be synthesised and a meta-analysis will be conducted with three or more studies reporting a particular factor in a consistent manner.

**Ethics and dissemination:** Ethical approval was not required for this systematic



1  
2  
3  
4 review. We will disseminate our findings through publication in a peer-reviewed  
5  
6 journal.

7  
8  
9 **PROSPERO registration number:** CRD 42020178798

10  
11 **KEYWORDS:** COVID-19; predictor; critical illness; mortality; prediction model;  
12  
13 systematic review  
14  
15

### 16 17 18 19 **Strengths and limitations of this study**

- 20  
21  
22 1) The evidence synthesis on prognostic factors and models of COVID-19 related  
23  
24 critical conditions will play a pivotal role in assisting front-line clinical decision  
25  
26 making.  
27  
28  
29 2) The quality of included studies will be evaluated using a validated tool (QUIPS)  
30  
31 specifically developed to assess the risk of bias of prognosis studies.  
32  
33  
34 3) Given that primary studies can be conducted in different region, population, or  
35  
36 setting, prognostic factors or models can be assessed using different tools,  
37  
38 heterogeneity in the pooled data may be a limitation of this review; however,  
39  
40 subgroup analyses will help overcome this limitation.  
41  
42  
43  
44  
45  
46  
47  
48  
49  
50  
51  
52  
53  
54  
55  
56  
57  
58  
59  
60

## INTRODUCTION

### Description of the condition

Coronavirus disease 2019 (COVID-19), a newly emerged respiratory disease caused by severe acute respiratory syndrome coronavirus 2 (SARS-CoV-2), was first reported in December 2019.[1, 2] The infection has recently spread to at least 188 countries and regions, with more than 25 million confirmed cases and 850,000 deaths worldwide as of 1 September 2020.[3] The number of people infected is probably much higher due to the shortage of tests for COVID-19. Despite a variety of rapid public health responses aimed at containing the disease, many countries have been confronted with enormous challenges to the healthcare systems posed by the overwhelming number of patients requiring hospital admission, especially by those with progression to severe or critical illness according to the criteria in the WHO recommendations or the local guidelines.[4-8]

### Why is it important to do this review?

A report of 72314 cases from the Chinese Center for Disease Control and Prevention showed that most of the patients with COVID-19 are asymptomatic or exhibit mild or moderate symptoms.[9] The vast majority of patients with mild and moderate symptoms are recommended to stay at home or are admitted in shelter/field hospitals.[10-14] However, patients with mild symptoms may develop rapidly worsening respiratory failure that requires intubation.[7] Approximately 5% to 29% of the patients progressed to a severe or critical condition such as acute respiratory distress

1  
2  
3  
4 syndrome or septic shock and/or multiple organ failure that required admission to the  
5  
6 intensive care unit.[9, 15-18] Patients who exhibited severe or critical symptoms or  
7  
8 patients at high risk to develop severe conditions were the main reason behind the  
9  
10 overwhelming number of patients who required admission or even intensive care.  
11  
12 Hence, it is crucial to determine the prognostic factors associated with the risk of a  
13  
14 subsequent critical outcome among patients with non-critical COVID-19. Prognostic  
15  
16 factors and prediction models for severe or critical COVID-19 have many potential uses  
17  
18 in various settings including informing individuals about the future course of their  
19  
20 illness, aiding triage and referral, early management of modifiable factors, treatment,  
21  
22 and other factors related to clinical decision making.  
23  
24  
25  
26  
27  
28  
29  
30  
31

### 32 **Status of the current literature**

33  
34  
35 Evidence is rapidly accumulating about prognostic factors and models for critical  
36  
37 conditions or mortality related to COVID-19. Recently, two systematic reviews  
38  
39 focusing on specific perspectives of COVID-19 have been published.[19, 20] Henry  
40  
41 and colleagues published a systematic review that included only the laboratory  
42  
43 biomarkers and excluded the clinical and imaging predictors associated with severe  
44  
45 illness and mortality in COVID-19.[19] Another review by Wynants and colleagues  
46  
47 focused on the prediction models for diagnosis and prognosis of COVID-19  
48  
49 infection.[20] Eight studies regarding prognostic models for severe state or mortality  
50  
51 were included. However, only the studies aimed at developing or validating a model or  
52  
53 a scoring system were included, while those aimed at predictor findings were excluded  
54  
55  
56  
57  
58  
59  
60

1  
2  
3  
4 from this systematic review.[20] In addition, since China was the first epicentre of  
5  
6 COVID-19, many studies on the prediction of COVID-19 may have been published in  
7  
8 Chinese journals. According to our preliminary results, more than 15 studies regarding  
9  
10 prognostic factors or models have been published in four Chinese databases (CNKI,  
11  
12 WANFANG, CBM, and VIP) that were not included in the aforementioned systematic  
13  
14 review. Limited data are available on the overview of evidence that focuses on clinical,  
15  
16 laboratory, and imaging prognostic factors for critical illness or mortality associated  
17  
18 with COVID-19. Moreover, a huge number of recent articles have emerged with the  
19  
20 worldwide pandemic. Many valuable articles on prognostic factors or models of  
21  
22 COVID-19 have not been included in these published reviews. Among these, some  
23  
24 high-quality papers have been published in leading journals,[21, 22] which provided us  
25  
26 with more evidence and insights into this topic. Therefore, there is a need for a  
27  
28 systematic review to evaluate and synthesise the data from the current studies from a  
29  
30 comprehensive perspective on clinical, laboratory, and imaging prognostic factors and  
31  
32 prediction models for critical illness and mortality associated with COVID-19.  
33  
34  
35  
36  
37  
38  
39  
40  
41  
42  
43  
44

### 45 **Research aims**

46  
47  
48 We aim to systematically assess the clinical, laboratory, and imaging predictors as  
49  
50 well as models for severe or critical illness and mortality in patients with COVID-19.  
51  
52 Predictors and models for critical illness may be different from that of mortality, so it  
53  
54 will be assessed according to different outcomes.  
55  
56  
57  
58  
59  
60

## METHODS

This systematic review protocol followed the Preferred Reporting Items for Systematic review and Meta-Analysis Protocols (PRISMA-P) recommendations [23] and the Cochrane Handbook. The PRISMA-P checklist is presented in online supplementary appendix 1. This review protocol was started in early April and has been registered with the International Prospective Register of Systematic Reviews (registration number: CRD 42020178798). [24]

### Search strategy

A systematic search of 11 public-domain databases including PubMed, EMBASE, Web of Science, Cochrane library, China National Knowledge Infrastructure (CNKI), Chinese Science and Technology Periodical Database (VIP), Wanfang database (Wanfang Data), China Biology Medicine disc (SinoMed), bioRxiv, Arxiv, and MedRxiv will be performed. We will use exploded Medical Subject Headings and the appropriate corresponding keywords related to the population, combined with exposure and outcomes such as: “COVID-19” OR “SARS-CoV-2” OR “2019-nCoV” OR “novel coronavirus” AND “critically” OR “severe” OR “mortality” OR “deterioration” AND “predictor” OR “prediction” OR “prognostic” OR “factor”. Additionally, a publication list of the COVID-19 Living Systematic Review[25] and other resources[26] will be screened for additional relevant references. There will be no restrictions on language or publication status (pre-print or peer-reviewed articles). The research will be restricted to articles concerning humans from December 2019 to the present. We will include

1  
2  
3  
4 additional papers from other sources including the references of review articles or  
5  
6 studies identified during screening. A sample search strategy for PubMed is shown in  
7  
8  
9 online supplementary appendix 2.  
10

## 11 12 13 14 **Eligibility criteria**

### 15 16 17 **Participants**

18  
19 All patients with confirmed diagnosis of COVID-19, explicitly classified as mild,  
20  
21 moderate, severe, or critically ill according to accepted diagnostic criteria such as the  
22  
23 WHO recommendations or the local guidelines, will be included. The criteria in the  
24  
25 guidelines may be modified over time. Thus, the criteria in different periods or regions  
26  
27 will be acceptable.  
28  
29  
30  
31

### 32 33 **Exposures**

34  
35 Any data related to demographics, symptoms and signs, pulmonary functions,  
36  
37 laboratory tests, radiological findings, comorbidities, and interventions will be  
38  
39 considered potential predictors for critical illness or mortality in patients with COVID-  
40  
41 19. This information may include factors such as the age, fever, shortness of breath,  
42  
43 underlying diseases, mechanical ventilation, and dexamethasone or other interventions.  
44  
45  
46  
47

### 48 49 **Comparators**

50  
51 Based on the published studies, many factors including older age; underlying  
52  
53 diseases such as hypertension, diabetes, and cardiovascular diseases; and chest  
54  
55 radiographic abnormalities were independent predictive factors for critical illness in  
56  
57 hospitalised patients with COVID-19.[21, 22] These potential variables will be  
58  
59  
60

1  
2  
3  
4 considered the comparators. Participants with and without specific clinical, laboratory,  
5  
6 and imaging information will be compared to clarify the significance of this information  
7  
8 in predicting critical illness and mortality associated with COVID-19.  
9  
10

## 11 **Outcomes**

12  
13  
14 The outcomes will include deterioration, progression, severe critical illness, or  
15  
16 death related to COVID-19 according to accepted criteria.  
17  
18

## 19 **Timing and setting**

20  
21  
22 There will be no restriction on the time point when the prognostic factors were  
23  
24 under review as well as on the period when the outcomes were predicted. No restriction  
25  
26 will be imposed on the setting.  
27  
28

## 29 **Types of study to be included**

30  
31  
32 Both experimental and longitudinal observational studies including randomised  
33  
34 controlled trials, cohort studies, case-control studies, and registry studies will be  
35  
36 included. Review articles, editorials, letters, comments, case reports, cross-sectional  
37  
38 studies, and studies that failed to investigate the prognostic factors or models for critical  
39  
40 illness or mortality will be excluded.  
41  
42  
43  
44  
45  
46  
47

## 48 **Study selection**

49  
50  
51 Two reviewers (Jian Liu, Luda Feng) will independently perform the initial search  
52  
53 and examine the titles, abstracts, and full texts (if necessary) to identify eligible studies  
54  
55 according to the inclusion and exclusion criteria. Disagreements between the reviewers  
56  
57 will be resolved by consensus and by adjudication of a third reviewer (Qiang Liu) in  
58  
59  
60

1  
2  
3  
4 case of persistent disagreement. The selection process is illustrated in a Preferred  
5  
6 Reporting Items for Systematic Reviews and Meta-Analyses diagram (Figure 1).[27]  
7  
8  
9

## 10 11 **Data extraction**

12  
13  
14 Data extraction will be independently conducted by two reviewers (Tianyi Zhang,  
15  
16 Ping Jiang), using a standard data extraction form developed according to the Critical  
17  
18 Appraisal and Data Extraction for Systematic Reviews of Prediction Modelling Studies  
19  
20 (CHARMS) checklist for prediction model studies and its modified version  
21  
22 (CHARMS-PF)[28, 29] as well as according to the Prediction model Risk Of Bias  
23  
24 Assessment Tool.[30] For each included trial, the following key information will be  
25  
26 extracted based on availability: name of the first author, year of publication, study  
27  
28 location, study design, study setting, participants, sample size, follow-up period,  
29  
30 outcomes of interest, risk and prognostic factors, missing data, summary statistics,  
31  
32 results, interpretation, and discussion. The authors of the studies will be contacted  
33  
34 through email or telephone in case of missing relevant data.  
35  
36  
37  
38  
39  
40  
41  
42  
43  
44  
45

## 46 **Assessment of the risk of bias**

47  
48 We will evaluate the risk of bias using the Newcastle-Ottawa Scale[31] and the  
49  
50 Quality In Prognosis Studies checklist, which has been recommended by the Cochrane  
51  
52 Group to assess the risk of bias in studies related to prognostic factors.[32] Quality  
53  
54 assessment will be performed independently by two reviewers (Tianyi Zhang, Ligaoge  
55  
56 Kang) and discrepancies will be resolved through consensus.  
57  
58  
59  
60



## Data synthesis

Essential data will be summarised in tables for evaluation. Estimates of risk difference in terms of critical illness and mortality will be calculated. For categorical variables, odds ratios, relative risks, or hazard ratios will be analysed to compare these variables between mild/moderate and severe/critical COVID-19 cases. Studies reporting adjusted or unadjusted results will be analysed separately. Only the unadjusted effect estimates for prognostic factors will be combined, while effect estimates from multivariate models will be described qualitatively. With three or more studies reporting a particular factor in a consistent manner, a meta-analysis will be conducted using the Review Manager software (RevMan 5.3, the Cochrane Collaboration, London, UK) to synthesise the association of prognostic factors and critical illness or mortality in patients with COVID-19. For severe or critical illness and mortality, the data will be synthesised according to different outcomes. Heterogeneity among the included studies will be tested using the  $I^2$  statistic.[33] Forest plots will be presented as significant predictors. In case of substantial heterogeneity, subgroup analyses will be conducted to examine or to explore the causes of heterogeneity. Subgroup analysis will be based on the categories defined by the following characteristics: study location/region, risk of bias, and particular population such as children and elderly people.

## Ethics and dissemination

Ethical approval was not required for this systematic review. We will disseminate

our findings through publication in a peer-reviewed journal.

### **Patient and public involvement**

There is no patient or public involvement in the whole process of conducting this systematic review.

## **DISCUSSION**

With an unprecedented threat of a worldwide COVID-19 pandemic, there has been an increasing need for early identification of patients at higher risk of progression to critical illness or even death. This systematic review will comprehensively summarise the existing evidence on clinical, laboratory, and imaging factors and models for predicting critical conditions and mortality in patients with COVID-19. The findings of this review will provide front-line clinicians an early surrogate for disease severity before the onset of critical illness, which may play a key role in assisting the clinicians in early management of modifiable factors, appropriate triaging of patients, and optimising the use of limited healthcare resources.

### **Acknowledgements**

We gratefully acknowledge Wei Chen from the Centre for Evidence-Based Chinese Medicine, Beijing University of Chinese Medicine, for her great help on the improvement of methodology of this protocol. We would like to thank Editage ([www.editage.com](http://www.editage.com)) for English language editing.

## Author affiliations

<sup>1</sup>MOE Key Laboratory of Bioinformatics, TCM-X Center/Bioinformatics Division, Tsinghua University, Beijing, China.

<sup>2</sup>Dongzhimen Hospital, Beijing University of Chinese Medicine, Beijing, China.

<sup>3</sup>Department of TCM Pulmonary Diseases, Center of Respiratory Medicine, China-Japan Friendship Hospital, Beijing, China.

<sup>4</sup>Beijing University of Chinese Medicine, Beijing, China.

<sup>5</sup>Department of Emergency, Fangshan Hospital, Beijing University of Chinese Medicine, Beijing, China.

<sup>6</sup>Center for Evidence-based Medicine, the World Federation of Chinese Medicine Societies, Beijing, China.

## Contributors

XL, YG conceived the research question. TZ, LF, PJ and LK developed the search strategy and performed the preliminary search, screening and data extraction. QL and YG contributed to the methodological development of the protocol. XL and JL drafted the manuscript. QL and YG revised the manuscript and all authors developed and approved the final manuscript before submission.

## Funding

None.

## Competing interests

None declared.

## Patient consent for publication

1  
2  
3  
4 Not required.  
5

6 **Provenance and peer review**  
7

8  
9 Not commissioned; externally peer reviewed.  
10  
11  
12  
13

14 **Figure 1. Flow diagram of the study selection process**  
15  
16  
17  
18  
19  
20  
21  
22  
23  
24  
25  
26  
27  
28  
29  
30  
31  
32  
33  
34  
35  
36  
37  
38  
39  
40  
41  
42  
43  
44  
45  
46  
47  
48  
49  
50  
51  
52  
53  
54  
55  
56  
57  
58  
59  
60

For peer review only

## References:

1. Wang C, Horby PW, Hayden FG, *et al.* A novel coronavirus outbreak of global health concern. *Lancet* 2020;395:470-3.
2. Munster VJ, Koopmans M, van Doremalen N, *et al.* A novel coronavirus emerging in china - key questions for impact assessment. *N Engl J Med* 2020;382:692-4.
3. Dong E, Du H, Gardner L. An interactive web-based dashboard to track covid-19 in real time. *Lancet Infect Dis* 2020.
4. Grasselli G, Zangrillo A, Zanella A, *et al.* Baseline characteristics and outcomes of 1591 patients infected with SARS-cov-2 admitted to icus of the lombardy region, italy. *JAMA* 2020.
5. Xie J, Tong Z, Guan X, *et al.* Critical care crisis and some recommendations during the covid-19 epidemic in china. *Intensive Care Med* 2020.
6. Grasselli G, Pesenti A, Cecconi M. Critical care utilization for the covid-19 outbreak in lombardy, italy: early experience and forecast during an emergency response. *JAMA* 2020.
7. Goh KJ, Choong MC, Cheong EH, *et al.* Rapid progression to acute respiratory distress syndrome: review of current understanding of critical illness from covid-19 infection. *Ann Acad Med Singapore* 2020;49:108-18.
8. Arabi YM, Murthy S, Webb S. Covid-19: a novel coronavirus and a novel challenge for critical care. *Intensive Care Med* 2020.
9. Wu Z, McGoogan JM. Characteristics of and important lessons from the coronavirus disease 2019 (covid-19) outbreak in china: summary of a report of 72314 cases from the chinese center for disease control and prevention. *JAMA* 2020.
10. Gostin LO, Wiley LF. Governmental public health powers during the covid-19 pandemic: stay-at-home orders, business closures, and travel restrictions. *JAMA* 2020.
11. Park PG, Kim CH, Heo Y, *et al.* Out-of-hospital cohort treatment of coronavirus disease 2019 patients with mild symptoms in korea: an experience from a single community treatment center. *JKorean Med Sci* 2020;35.
12. Kmietowicz Z. Covid-19: highest risk patients are asked to stay at home for 12 weeks. *BMJ* 2020:m1170.
13. Chen Z, He S, Li F, *et al.* Mobile field hospitals, an effective way of dealing with covid-19 in china: sharing our experience. *Biosci Trends* 2020.
14. Chen S, Zhang Z, Yang J, *et al.* Fangcang shelter hospitals: a novel concept for responding to public health emergencies. *Lancet* 2020;395:1305-14.
15. Huang C, Wang Y, Li X, *et al.* Clinical features of patients infected with 2019 novel coronavirus in wuhan, china. *Lancet* 2020;395:497-506.
16. Rodriguez-Morales AJ, Cardona-Ospina JA, Gutierrez-Ocampo E, *et al.* Clinical, laboratory and imaging features of covid-19: a systematic review and meta-analysis. *Travel Med Infect Dis* 2020:101623.
17. Cao Y, Liu X, Xiong L, *et al.* Imaging and clinical features of patients with 2019 novel coronavirus SARS-cov-2: a systematic review and meta-analysis. *J Med Virol* 2020.
18. Xu Z, Shi L, Wang Y, *et al.* Pathological findings of covid-19 associated with acute respiratory distress syndrome. *Lancet Respir Med* 2020;8:420-2.
19. Henry BM, de Oliveira M, Benoit S, *et al.* Hematologic, biochemical and immune biomarker abnormalities associated with severe illness and mortality in coronavirus disease 2019 (covid-19): a meta-analysis. *Clin Chem Lab Med* 2020.

20. Wynants L, Van Calster B, Bonten M, *et al.* Prediction models for diagnosis and prognosis of covid-19 infection: systematic review and critical appraisal. *BMJ*. 2020;369:m1328.
21. Liang W, Liang H, Ou L, *et al.* Development and Validation of a Clinical Risk Score to Predict the Occurrence of Critical Illness in Hospitalized Patients With COVID-19. *JAMA Intern Med*. 2020;180(8):1-9.
22. Zhu L, She ZG, Cheng X, *et al.* Association of Blood Glucose Control and Outcomes in Patients with COVID-19 and Pre-existing Type 2 Diabetes. *Cell Metab*. 2020;31(6):1068-1077.e3.
23. Preferred reporting items for systematic review and meta-analysis protocols (PRISMA-P) 2015: elaboration and explanation. *BMJ* 2016;354:i4086.
24. Centre for Reviews and Dissemination, University of York. PROSPERO: International Prospective Register of Systematic Reviews. ([https://www.crd.york.ac.uk/prospERO/display\\_record.php?ID=CRD42020178798](https://www.crd.york.ac.uk/prospERO/display_record.php?ID=CRD42020178798))
25. Institute of Social and Preventive Medicine. Living evidence on COVID-19 2020. (<https://ispmbern.github.io/covid-19/living-review/index.html>)
26. Shokraneh F. Keeping up with studies on covid-19: systematic search strategies and resources. *BMJ* 2020;369:m1601.
27. Liberati A, Altman DG, Tetzlaff J, *et al.* The prisma statement for reporting systematic reviews and meta-analyses of studies that evaluate healthcare interventions: explanation and elaboration. *BMJ* 2009;339:b2700.
28. Riley RD, Moons K, Snell K, *et al.* A guide to systematic review and meta-analysis of prognostic factor studies. *BMJ* 2019;364:k4597.
29. Moons KG, de Groot JA, Bouwmeester W, *et al.* Critical appraisal and data extraction for systematic reviews of prediction modelling studies: the charms checklist. *Plos Med* 2014;11:e1001744.
30. Moons K, Wolff RF, Riley RD, *et al.* Probast: a tool to assess risk of bias and applicability of prediction model studies: explanation and elaboration. *Ann Intern Med* 2019;170:W1-33.
31. Wells GA, Shea B, O'Connell D, *et al.* The Newcastle-Ottawa Scale (NOS) for assessing the quality of nonrandomized studies in meta-analyses. 2009. ([http://www.ohri.ca/programs/clinical\\_epidemiology/oxford.htm](http://www.ohri.ca/programs/clinical_epidemiology/oxford.htm))
32. Hayden JA, van der Windt DA, Cartwright JL, *et al.* Assessing bias in studies of prognostic factors. *Ann Intern Med* 2013;158:280-6.
33. Higgins JP, Thompson SG, Deeks JJ, *et al.* Measuring inconsistency in meta-analyses. *BMJ* 2003;327:557-60.

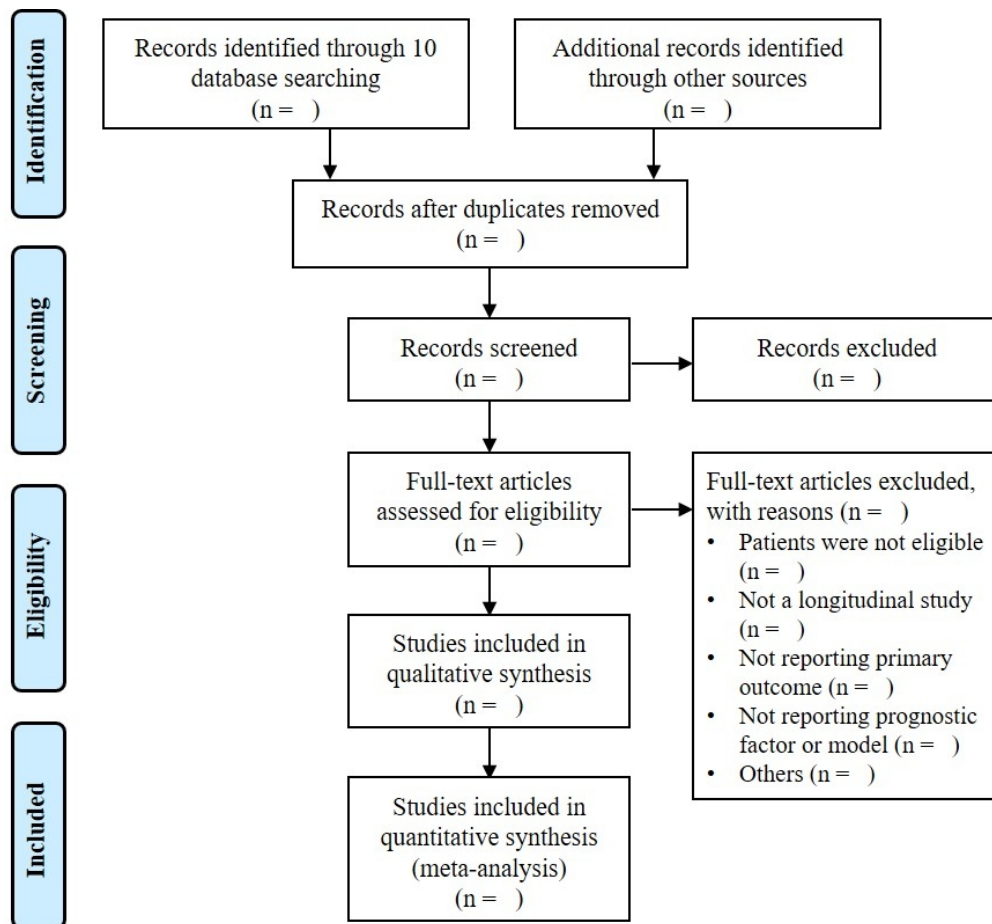

Figure 1. Flow diagram of the study selection process

146x134mm (150 x 150 DPI)

**PRISMA-P (Preferred Reporting Items for Systematic review and Meta-Analysis Protocols) 2015 checklist: recommended items to address in a systematic review protocol\***

| Section/topic                     | #  | Checklist item                                                                                                                                                                                                            | Information reported                |                          | Page number(s) |
|-----------------------------------|----|---------------------------------------------------------------------------------------------------------------------------------------------------------------------------------------------------------------------------|-------------------------------------|--------------------------|----------------|
|                                   |    |                                                                                                                                                                                                                           | Yes                                 | No                       |                |
| <b>ADMINISTRATIVE INFORMATION</b> |    |                                                                                                                                                                                                                           |                                     |                          |                |
| <b>Title</b>                      |    |                                                                                                                                                                                                                           |                                     |                          |                |
| Identification                    | 1a | Identify the report as a protocol of a systematic review                                                                                                                                                                  | <input checked="" type="checkbox"/> | <input type="checkbox"/> | 1              |
| Update                            | 1b | If the protocol is for an update of a previous systematic review, identify as such                                                                                                                                        | <input type="checkbox"/>            | <input type="checkbox"/> | NA             |
| <b>Registration</b>               | 2  | If registered, provide the name of the registry (e.g., PROSPERO) and registration number in the Abstract                                                                                                                  | <input type="checkbox"/>            | <input type="checkbox"/> | 3              |
| <b>Authors</b>                    |    |                                                                                                                                                                                                                           |                                     |                          |                |
| Contact                           | 3a | Provide name, institutional affiliation, and e-mail address of all protocol authors; provide physical mailing address of corresponding author                                                                             | <input checked="" type="checkbox"/> | <input type="checkbox"/> | 1              |
| Contributions                     | 3b | Describe contributions of protocol authors and identify the guarantor of the review                                                                                                                                       | <input checked="" type="checkbox"/> | <input type="checkbox"/> | 13             |
| <b>Amendments</b>                 | 4  | If the protocol represents an amendment of a previously completed or published protocol, identify as such and list changes; otherwise, state plan for documenting important protocol amendments                           | <input type="checkbox"/>            | <input type="checkbox"/> | NA             |
| <b>Support</b>                    |    |                                                                                                                                                                                                                           |                                     |                          |                |
| Sources                           | 5a | Indicate sources of financial or other support for the review                                                                                                                                                             | <input type="checkbox"/>            | <input type="checkbox"/> | NA             |
| Sponsor                           | 5b | Provide name for the review funder and/or sponsor                                                                                                                                                                         | <input type="checkbox"/>            | <input type="checkbox"/> | NA             |
| Role of sponsor/funder            | 5c | Describe roles of funder(s), sponsor(s), and/or institution(s), if any, in developing the protocol                                                                                                                        | <input type="checkbox"/>            | <input type="checkbox"/> | NA             |
| <b>INTRODUCTION</b>               |    |                                                                                                                                                                                                                           |                                     |                          |                |
| <b>Rationale</b>                  | 6  | Describe the rationale for the review in the context of what is already known                                                                                                                                             | <input checked="" type="checkbox"/> | <input type="checkbox"/> | 5, 6           |
| <b>Objectives</b>                 | 7  | Provide an explicit statement of the question(s) the review will address with reference to participants, interventions, comparators, and outcomes (PICO)                                                                  | <input checked="" type="checkbox"/> | <input type="checkbox"/> | 6              |
| <b>METHODS</b>                    |    |                                                                                                                                                                                                                           |                                     |                          |                |
| <b>Eligibility criteria</b>       | 8  | Specify the study characteristics (e.g., PICO, study design, setting, time frame) and report characteristics (e.g., years considered, language, publication status) to be used as criteria for eligibility for the review | <input checked="" type="checkbox"/> | <input type="checkbox"/> | 8, 9           |



| Section/topic                      | #   | Checklist item                                                                                                                                                                                                                              | Information reported                |                                     | Page number(s) |
|------------------------------------|-----|---------------------------------------------------------------------------------------------------------------------------------------------------------------------------------------------------------------------------------------------|-------------------------------------|-------------------------------------|----------------|
|                                    |     |                                                                                                                                                                                                                                             | Yes                                 | No                                  |                |
| Information sources                | 9   | Describe all intended information sources (e.g., electronic databases, contact with study authors, trial registers, or other grey literature sources) with planned dates of coverage                                                        | <input checked="" type="checkbox"/> | <input type="checkbox"/>            | 7              |
| Search strategy                    | 10  | Present draft of search strategy to be used for at least one electronic database, including planned limits, such that it could be repeated                                                                                                  | <input checked="" type="checkbox"/> | <input type="checkbox"/>            | 7, 8           |
| <b>STUDY RECORDS</b>               |     |                                                                                                                                                                                                                                             |                                     |                                     |                |
| Data management                    | 11a | Describe the mechanism(s) that will be used to manage records and data throughout the review                                                                                                                                                | <input checked="" type="checkbox"/> | <input type="checkbox"/>            | 9              |
| Selection process                  | 11b | State the process that will be used for selecting studies (e.g., two independent reviewers) through each phase of the review (i.e., screening, eligibility, and inclusion in meta-analysis)                                                 | <input checked="" type="checkbox"/> | <input type="checkbox"/>            | 9, 10          |
| Data collection process            | 11c | Describe planned method of extracting data from reports (e.g., piloting forms, done independently, in duplicate), any processes for obtaining and confirming data from investigators                                                        | <input checked="" type="checkbox"/> | <input type="checkbox"/>            | 10             |
| Data items                         | 12  | List and define all variables for which data will be sought (e.g., PICO items, funding sources), any pre-planned data assumptions and simplifications                                                                                       | <input checked="" type="checkbox"/> | <input type="checkbox"/>            | 10             |
| Outcomes and prioritization        | 13  | List and define all outcomes for which data will be sought, including prioritization of main and additional outcomes, with rationale                                                                                                        | <input checked="" type="checkbox"/> | <input type="checkbox"/>            | 9              |
| Risk of bias in individual studies | 14  | Describe anticipated methods for assessing risk of bias of individual studies, including whether this will be done at the outcome or study level, or both; state how this information will be used in data synthesis                        | <input checked="" type="checkbox"/> | <input type="checkbox"/>            | 10             |
| <b>DATA</b>                        |     |                                                                                                                                                                                                                                             |                                     |                                     |                |
| Synthesis                          | 15a | Describe criteria under which study data will be quantitatively synthesized                                                                                                                                                                 | <input checked="" type="checkbox"/> | <input type="checkbox"/>            | 11             |
|                                    | 15b | If data are appropriate for quantitative synthesis, describe planned summary measures, methods of handling data, and methods of combining data from studies, including any planned exploration of consistency (e.g., $I^2$ , Kendall's tau) | <input checked="" type="checkbox"/> | <input type="checkbox"/>            | 11             |
|                                    | 15c | Describe any proposed additional analyses (e.g., sensitivity or subgroup analyses, meta-regression)                                                                                                                                         | <input checked="" type="checkbox"/> | <input type="checkbox"/>            | 11             |
|                                    | 15d | If quantitative synthesis is not appropriate, describe the type of summary planned                                                                                                                                                          | <input checked="" type="checkbox"/> | <input type="checkbox"/>            | 11             |
| Meta-bias(es)                      | 16  | Specify any planned assessment of meta-bias(es) (e.g., publication bias across studies, selective reporting within studies)                                                                                                                 | <input checked="" type="checkbox"/> | <input type="checkbox"/>            | 11             |
| Confidence in cumulative evidence  | 17  | Describe how the strength of the body of evidence will be assessed (e.g., GRADE)                                                                                                                                                            | <input type="checkbox"/>            | <input checked="" type="checkbox"/> | NA             |

1  
2 **\* It is strongly recommended that this checklist be read in conjunction with the PRISMA-P Explanation and Elaboration (cite when available) for important clarification on the**  
3 **items. Amendments to a review protocol should be tracked and dated. The copyright for PRISMA-P (including checklist) is held by the PRISMA-P Group and is distributed under**  
4 **a Creative Commons Attribution Licence 4.0.**  
5

6 *From: Shamseer L, Moher D, Clarke M, Ghersi D, Liberati A, Petticrew M, Shekelle P, Stewart L, PRISMA-P Group. Preferred reporting items for systematic review and meta-analysis protocols*  
7 *(PRISMA-P) 2015: elaboration and explanation. BMJ. 2015 Jan 2;349(jan02 1):g7647.*  
8  
9  
10  
11  
12  
13  
14  
15  
16  
17  
18  
19  
20  
21  
22  
23  
24  
25  
26  
27  
28  
29  
30  
31  
32  
33  
34  
35  
36  
37  
38  
39  
40  
41  
42  
43  
44  
45  
46

For peer review only

## Appendix 2. Search Strategy Example: PubMed search

---

**No Search items**


---

|    |                                                   |    |                                               |
|----|---------------------------------------------------|----|-----------------------------------------------|
| 1  | “Covid-19”[All Fields]                            | 20 | “deteriorate*” [title/abstract]               |
| 2  |                                                   | 21 | “worsen*” [title/abstract]                    |
| 3  |                                                   | 22 | “progress*” [title/abstract]                  |
| 4  |                                                   | 23 | <b>12 OR 13 OR 14 OR 15 OR 16 OR 17 OR 18</b> |
| 5  |                                                   |    | <b>OR 19 OR 20 OR 21 OR 22</b>                |
| 6  | 1 “Covid-19”[All Fields]                          | 24 | “predict*” [title/abstract]                   |
| 7  |                                                   | 25 | “prognos*”[title/abstract]                    |
| 8  |                                                   | 26 | “risk”[title/abstract]                        |
| 9  | 2 “coronavirus disease 2019”[All Fields]          | 27 | “factor”[title/abstract]                      |
| 10 |                                                   | 28 | “algorithm”[title/abstract]                   |
| 11 | 3 “SARS-CoV-2”[All Fields]                        | 29 | “score” [title/abstract]                      |
| 12 |                                                   | 30 | “marker*” [title/abstract]                    |
| 13 |                                                   | 31 | “biomarker*” [title/abstract]                 |
| 14 | 4 “novel coronavirus”[All Fields]                 | 32 | <b>24 OR 25 26 OR 27 OR 28 OR 29 OR 30 OR</b> |
| 15 |                                                   | 33 | <b>31</b>                                     |
| 16 |                                                   | 34 | “humans”[filter]                              |
| 17 | 5 “new coronavirus”[All Fields]                   | 35 | “review”[filter]                              |
| 18 |                                                   | 36 | “case reports” [filter]                       |
| 19 | 6 “severe acute respiratory syndrome coronavirus  | 37 | <b>34 OR 35 OR 36</b>                         |
| 20 | 2”[All Fields]                                    | 38 | <b>(11 AND 23 AND 32 AND 33) NOT 37</b>       |
| 21 |                                                   |    |                                               |
| 22 | 7 “novel coronavirus-infected pneumonia”[All      |    |                                               |
| 23 | Fields]                                           |    |                                               |
| 24 |                                                   |    |                                               |
| 25 | 8 “2019-nCoV”[All Fields]                         |    |                                               |
| 26 |                                                   |    |                                               |
| 27 | 9 “Wuhan coronavirus”[All Fields]                 |    |                                               |
| 28 |                                                   |    |                                               |
| 29 | 10 “NCP”[All Fields]                              |    |                                               |
| 30 |                                                   |    |                                               |
| 31 | 11 <b>1 OR 2 OR 3 OR 4 OR 5 OR 6 OR 7 OR 8 OR</b> |    |                                               |
| 32 |                                                   |    |                                               |
| 33 | <b>9 OR 10</b>                                    |    |                                               |
| 34 |                                                   |    |                                               |
| 35 | 12 “Critical*”[title/abstract]                    |    |                                               |
| 36 |                                                   |    |                                               |
| 37 | 13 “intensive”[title/abstract]                    |    |                                               |
| 38 |                                                   |    |                                               |
| 39 | 14 “ICU” [title/abstract]                         |    |                                               |
| 40 |                                                   |    |                                               |
| 41 | 15 “severe” [title/abstract]                      |    |                                               |
| 42 |                                                   |    |                                               |
| 43 | 16 “death” [title/abstract]                       |    |                                               |
| 44 |                                                   |    |                                               |
| 45 | 17 “mortality” [title/abstract]                   |    |                                               |
| 46 |                                                   |    |                                               |
| 47 | 18 “decease*” [title/abstract]                    |    |                                               |
| 48 |                                                   |    |                                               |
| 49 | 19 “survival” [title/abstract]                    |    |                                               |
| 50 |                                                   |    |                                               |
| 51 |                                                   |    |                                               |
| 52 |                                                   |    |                                               |
| 53 |                                                   |    |                                               |
| 54 |                                                   |    |                                               |
| 55 |                                                   |    |                                               |
| 56 |                                                   |    |                                               |
| 57 |                                                   |    |                                               |
| 58 |                                                   |    |                                               |
| 59 |                                                   |    |                                               |
| 60 |                                                   |    |                                               |

---
