# Supplementary material for: Clinical, laboratory and imaging predictors for critical illness and mortality in patients with COVID-19: protocol for a systematic review and meta-analysis
Source: PubMed Central journal article supplement — BMJ Open. 2020 Dec 24;10(12):e039813. doi: 10.1136/bmjopen-2020-039813 (PMC7768616; doi:10.1136/bmjopen-2020-039813), 2020-12-24
Supplement: bmjopen-2020-039813supp002.pdf [file bmjopen-2020-039813supp002.pdf]

## Appendix 2. Search Strategy Example: PubMed search

**No Search items**

|                                                           |                                                               |                                                     |                                 |
|-----------------------------------------------------------|---------------------------------------------------------------|-----------------------------------------------------|---------------------------------|
| 1                                                         | “Covid-19”[All Fields]                                        | 20                                                  | “deteriorate*” [title/abstract] |
| 2                                                         | “coronavirus disease 2019”[All Fields]                        | 21                                                  | “worsen*” [title/abstract]      |
| 3                                                         | “SARS-CoV-2”[All Fields]                                      | 22                                                  | “progress*” [title/abstract]    |
| 4                                                         | “novel coronavirus”[All Fields]                               | <b>23 12 OR 13 OR 14 OR 15 OR 16 OR 17 OR 18</b>    |                                 |
| 5                                                         | “new coronavirus”[All Fields]                                 | <b>OR 19 OR 20 OR 21 OR 22</b>                      |                                 |
| 6                                                         | “severe acute respiratory syndrome coronavirus 2”[All Fields] | 24                                                  | “predict*” [title/abstract]     |
| 7                                                         | “novel coronavirus-infected pneumonia”[All Fields]            | 25                                                  | “prognos*”[title/abstract]      |
| 8                                                         | “2019-nCoV”[All Fields]                                       | 26                                                  | “risk”[title/abstract]          |
| 9                                                         | “Wuhan coronavirus”[All Fields]                               | 27                                                  | “factor”[title/abstract]        |
| 10                                                        | “NCP”[All Fields]                                             | 28                                                  | “algorithm”[title/abstract]     |
| <b>11 1 OR 2 OR 3 OR 4 OR 5 OR 6 OR 7 OR 8 OR 9 OR 10</b> |                                                               | 29                                                  | “score” [title/abstract]        |
| 12                                                        | “Critical*”[title/abstract]                                   | 30                                                  | “marker*” [title/abstract]      |
| 13                                                        | “intensive”[title/abstract]                                   | 31                                                  | “biomarker*” [title/abstract]   |
| 14                                                        | “ICU” [title/abstract]                                        | <b>32 24 OR 25 26 OR 27 OR 28 OR 29 OR 30 OR 31</b> |                                 |
| 15                                                        | “severe” [title/abstract]                                     | 33                                                  | “humans”[filter]                |
| 16                                                        | “death” [title/abstract]                                      | 34                                                  | “review”[filter]                |
| 17                                                        | “mortality” [title/abstract]                                  | 35                                                  | “case reports” [filter]         |
| 18                                                        | “decease*” [title/abstract]                                   | 36                                                  | “editorial” [filter]            |
| 19                                                        | “survival” [title/abstract]                                   | <b>37 34 OR 35 OR 36</b>                            |                                 |
|                                                           |                                                               | <b>38 (11 AND 23 AND 32 AND 33) NOT 37</b>          |                                 |
